# Supplementary material for: The Impact of Heterologous Regulatory Genes from Lipodepsipeptide Biosynthetic Gene Clusters on the Production of Teicoplanin and A40926
Source: MDPI journal article supplement (doi:10.3390/antibiotics13020115), 2024-01-24
Supplement: s1 [file s1]

## Electronic Supplementary Materials

### **The impact of heterologous regulatory genes from lipodepsipeptide biosynthetic gene clusters on the production of teicoplanin and A40926**

Kseniia Zhukrovska <sup>1</sup>, Elisa Binda <sup>2</sup>, Victor Fedorenko <sup>1</sup>, Flavia Marinelli <sup>2,\*</sup>, and Oleksandr Yushchuk <sup>1,2</sup>

<sup>1</sup> Department of Genetics and Biotechnology, Ivan Franko National University of Lviv, Lviv, Ukraine

<sup>2</sup> Department of Biotechnology and Life Sciences, University of Insubria, Varese, Italy

\* Correspondence: [flavia.marinelli@uninsubria.it](mailto:flavia.marinelli@uninsubria.it); Tel.: +39-0332-42-1546

**Table S1.** Information of StrR-like PSRs coded within LDP BGCs (A), as well as in antibiotic BGCs available in MIBiG (B).

| MIBiG/GenBank<br>accession number<br>for the hit                             | Protein ID                  | E-<br>value   | Amino<br>acid<br>sequence<br>identity | Microorganism                                              | Antibiotic     | Class                        | Reference |
|------------------------------------------------------------------------------|-----------------------------|---------------|---------------------------------------|------------------------------------------------------------|----------------|------------------------------|-----------|
| (1)                                                                          | (2)                         | (3)           | (4)                                   | (5)                                                        | (6)            | (7)                          | (8)       |
|                                                                              | Ramo5                       |               |                                       | <i>Actinoplanes<br/>ramoplaninifer</i><br>ATCC 33076       | Ramoplanin     | LDP                          | [1]       |
| <b>(A) StrR-like pathway specific regulators from LDP BGCs</b>               |                             |               |                                       |                                                            |                |                              |           |
| BGC0000341                                                                   | End22<br>ABD65942           | 4.53e-<br>58  | 49.2%                                 | <i>Streptomyces<br/>fungicidicus</i> ATCC<br>21013         | Enduracidin    | LDP                          | [2]       |
| BGC0000341                                                                   | End24<br>ABD65944           | 2.28e-<br>71  | 43.2%                                 | <i>Streptomyces<br/>fungicidicus</i> ATCC<br>21013         | Enduracidin    | LDP                          | [2]       |
| NZ_FMIB0100000<br>2                                                          | Chers28<br>WP_09130<br>5478 | 8.99e-<br>128 | 71.6%                                 | <i>Micromonospora<br/>chersina</i> DSM<br>44151            | Chersina-mycin | LDP                          | [3]       |
| NZ_KB913037                                                                  | Not<br>annotated            | 2.25e-<br>71  | 47.2%                                 | <i>Amycolatopsis<br/>balhimycina</i> FH<br>1894            | Putative LDP   | LDP                          | [3]       |
| NZ_KB913037                                                                  | Not<br>annotated            | 9.46e-<br>69  | 45.8%                                 | <i>Amycolatopsis<br/>balhimycina</i> FH<br>1894            | Putative LDP   | LDP                          | [3]       |
| CP016174                                                                     | ANN21820                    | 1.97e-<br>71  | 45.8%                                 | <i>Amycolatopsis<br/>orientalis</i> B-37                   | Putative LDP   | LDP                          | [3]       |
| CP016174                                                                     | ANN21819                    | 5.83e-<br>69  | 45.2%                                 | <i>Amycolatopsis<br/>orientalis</i> B-37                   | Putative LDP   | LDP                          | [3]       |
| NZ ASJB01000042                                                              | WP_23578<br>3490            | 4.77e-<br>72  | 46.0%                                 | <i>Amycolatopsis<br/>orientalis</i> DSM<br>40040/KCTC 9412 | Putative LDP   | LDP                          | [3]       |
| NZ ASJB01000042                                                              | WP_23578<br>3491            | 1.02e-<br>69  | 45.8%                                 | <i>Amycolatopsis<br/>orientalis</i> DSM<br>40040/KCTC 9412 | Putative LDP   | LDP                          | [3]       |
| LT629775                                                                     | SDT43639.<br>1              | 3.26e-<br>56  | 41.1%                                 | <i>Streptomyces</i> sp.<br>TLI_053                         | Putative LDP   | LDP                          | [3]       |
| VFOE01000001                                                                 | TQL19429                    | 1.78e-<br>72  | 49.2%                                 | <i>Streptomyces</i> sp.<br>SLBN-134<br>Ga0314649_11        | Putative LDP   | LDP                          | [3]       |
| VFOE01000001                                                                 | TQL19431                    | 3.02e-<br>63  | 43.1%                                 | <i>Streptomyces</i> sp.<br>SLBN-134<br>Ga0314649_11        | Putative LDP   | LDP                          | [3]       |
| <b>(B) StrR-like pathway specific regulators of BCGs from MIBiG database</b> |                             |               |                                       |                                                            |                |                              |           |
| BGC0000021                                                                   | ApoR3<br>AEP40926           | 1.53e-<br>70  | 48.2%                                 | <i>Nocardiopsis</i> sp.<br>FU 40                           | Apoptolidin    | Type I<br>polyketide         | [4]       |
| BGC0001381                                                                   | NbrR10<br>AJO72769          | 7.30e-<br>49  | 39.3%                                 | <i>Nocardia terpenica</i><br>IFM 0406                      | Brasilinolide  | Type I<br>polyketide         | [5]       |
| BGC0000159                                                                   | TtmQ<br>ABW96549            | 4.85e-<br>53  | 41.3%                                 | <i>Streptomyces<br/>spiroverticillatus</i><br>CGMCC:4.1749 | Tautomycin     | Modular type<br>I polyketide | [6]       |

| (1)        | (2)               | (3)      | (4)   | (5)                                                                           | (6)                 | (7)                          | (8)  |
|------------|-------------------|----------|-------|-------------------------------------------------------------------------------|---------------------|------------------------------|------|
| BGC0000112 | AAM78007          | 2.14e-58 | 40.2% | <i>Streptomyces carzinostaticus</i> ssp. <i>neocarzinostaticus</i> ATCC 15944 | Neocarzinostatin    | Enediynes, type I polyketide | [7]  |
| BGC0000965 | AAL06695          | 2.44e-65 | 42.2% | <i>Streptomyces globisporus</i> C-1027                                        | C-1027              | Enediynes, type I polyketide | [8]  |
| BGC0001008 | MdpR1<br>ABY65997 | 1.20e-64 | 46.6% | <i>Actinomadura madurae</i> ATCC 39144                                        | Maduropeptin        | Enediynes, type I polyketide | [9]  |
| BGC0001397 | ALU98457          | 2.44e-65 | 42.2% | <i>Streptomyces globisporus</i> C-1027                                        | C-1027              | Enediynes, type I polyketide | [10] |
| BGC0001584 | ANY94466          | 1.79e-64 | 42.5% | <i>Streptomyces</i> sp. CB02366                                               | C-1027              | Enediynes, type I polyketide | [11] |
| BGC0001904 | ALJ99870          | 6.16e-67 | 44.2% | <i>Micromonospora rosaria</i> SCSIO N160                                      | Fluostatin          | Type II polyketide           | [12] |
| BGC0000240 | Lom15<br>AHZ61849 | 6.50e-53 | 37.8% | <i>Salinispora pacifica</i> DPJ-0016                                          | Lomaiviticin        | Type II polyketide           | [13] |
| BGC0000241 | ABP54638          | 9.22e-54 | 36.8% | <i>Salinispora tropica</i> CNB-440                                            | Lomaiviticin        | Type II polyketide           | [13] |
| BGC0000267 | SaqI<br>ACP19349  | 1.68e-76 | 49.7% | <i>Micromonospora</i> sp. Tü 6368                                             | Saquayamycin        | Type II polyketide           | [14] |
| BGC0001596 | WP_15939<br>3028  | 9.99e-61 | 45.1% | <i>Streptomyces albus</i> DSM 41398                                           | Fluostatins         | Type II polyketide           | [15] |
| BGC0001693 | ARD70863          | 2.18e-58 | 40.9% | <i>Micromonospora echinospora</i> SCSIO 04089                                 | Nenestatin          | Type II polyketide           | [16] |
| BGC0000690 | StrR<br>CAA07385  | 1.11e-72 | 46.5% | <i>Streptomyces glaucescens</i> GLA.0                                         | Hydroxystreptomycin | Aminoglycoside               | [17] |
| BGC0000698 | ABC42540          | 9.85e-58 | 42.8% | <i>Streptomyces hygroscopicus</i> NRRL 2388                                   | Hygromycin          | Aminoglycoside               | [18] |
| BGC0000702 | BAD20753          | 1.18e-63 | 44.9% | <i>Streptomyces kanamyceticus</i> ATCC 12853                                  | Kanamycin           | Aminoglycoside               | [19] |
| BGC0000716 | SpcR<br>AAB66654  | 2.15e-66 | 43.6% | <i>Streptomyces netropsis</i> JCM 4063                                        | Spectinomycin       | Aminoglycoside               | [20] |
| BGC0000724 | StrR<br>BAG22760  | 3.37e-70 | 47.2% | <i>Streptomyces griseus</i> ssp. <i>griseus</i> NBRC 13350                    | Streptomycin        | Aminoglycoside               | [21] |
| BGC0000832 | CloG<br>AAN65222  | 1.92e-59 | 43.9% | <i>Streptomyces roseochromogenus</i> subsp. <i>oscitans</i> DS 12.976         | Clorobiocin         | Aminocoumarin                | [22] |
| BGC0000833 | CouG<br>AAG29778  | 2.35e-56 | 41.3% | <i>Streptomyces rishiriensis</i> DSM 40489                                    | Coumermycin         | Aminocoumarin                | [23] |
| BGC0000834 | NovG<br>AAF67500  | 4.28e-53 | 41.8% | <i>Streptomyces niveus</i> NCIMB 9219                                         | Novobiocin          | Aminocoumarin                | [24] |

| (1)        | (2)               | (3)          | (4)   | (5)                                                                         | (6)                     | (7)                           | (8)  |
|------------|-------------------|--------------|-------|-----------------------------------------------------------------------------|-------------------------|-------------------------------|------|
| BGC0001783 | StrT2<br>AFW04588 | 2.79e-<br>61 | 43.4% | <i>Streptomyces<br/>flocculus</i><br>CGMCC 4.1223                           | Streptonigrin           | Aminoquinon<br>e alkaloid     | [25] |
| BGC0000935 | EsmT1<br>AFB35624 | 3.61e-<br>62 | 43.4% | <i>Streptomyces<br/>antibioticus</i><br>Tü 2706                             | Esmeraldin              | Phenazine                     | [26] |
| BGC0000679 | EWM63064          | 1.08e-<br>70 | 48.1% | <i>Micromonospora<br/>sp. M42</i>                                           | Diazepinomicin          | Terpene                       | [27] |
| BGC0002591 | ARM20266          | 1.80e-<br>59 | 46.5% | <i>Streptomyces</i> sp.<br>NA04227                                          | Aurachin                | ladderane,terp<br>ene         | [28] |
| BGC0001387 | AMP46602          | 2.21e-<br>60 | 41.7% | <i>Streptomyces calvus</i><br>ATCC 13382                                    | Nucleocidin             | Fluorinated<br>ribonucleoside | [29] |
| BGC0001985 | QER91000          | 6.25e-<br>46 | 36.5% | <i>Streptomyces<br/>candidus</i><br>NRRL 3601                               | Pyrazofurin             | C-nucleoside                  | [30] |
| BGC0002039 | FocG<br>AVW82900  | 1.99e-<br>48 | 37.7% | <i>Nocardia interforma</i><br>ATCC 21072                                    | Coformycin,<br>formycin | C-nucleoside                  | [31] |
| BGC0001193 | DtpR2<br>AJI44174 | 9.70e-<br>76 | 48.6% | <i>Saccharothrix<br/>algeriensis</i><br>NRRL B-24137                        | Thiolutin               | Dithiopyrrol<br>one           | [32] |
| BGC0000893 | CCA54200          | 7.10e-<br>58 | 43.5% | <i>Streptomyces<br/>venezuelae</i><br>ATCC 10712                            | Chloramphenico<br>l     | NRP                           | [33] |
| BGC0001620 | ASX95224          | 6.85e-<br>70 | 47.9% | <i>Streptomyces<br/>atratus</i><br>SCSIO_ZH16                               | Ilamycin                | Cyclic NRP                    | [34] |
| BGC0001763 | RufA<br>BBA20948  | 5.12e-<br>70 | 47.9% | <i>Streptomyces<br/>atratus</i><br>SCSIO_ZH16                               | Rufomycin               | Cyclic NRP                    | [35] |
| BGC0001233 | FegB<br>ALK27899  | 1.03e-<br>66 | 43.5% | <i>Streptomyces</i> sp.<br>DSM 11171                                        | Feglymycin              | Linear NRP                    | [36] |
| BGC0000311 | Bbr<br>CAG25754   | 6.57e-<br>71 | 45.9% | <i>Amycolatopsis<br/>balhimycina</i> DSM<br>5908                            | Balhimycin              | Type I GPA                    | [37] |
| BGC0000455 | VtrR<br>AEI58862  | 5.70e-<br>74 | 47.2% | <i>Amycolatopsis<br/>orientalis</i><br>HCCB10007                            | Vancomycin              | Type I GPA                    | [38] |
| BGC0001459 | OKA09420          | 3.95e-<br>71 | 45.6% | <i>Amycolatopsis<br/>regifaucium</i> GY080                                  | Decaplanin              | Type I GPA                    | [39] |
| BGC0001460 | EME52993          | 1.28e-<br>71 | 45.9% | <i>Amycolatopsis<br/>decaplanina</i> DSM<br>44594                           | Decaplanin              | Type I GPA                    | [40] |
| BGC0001461 | OLZ50883          | 5.07e-<br>70 | 46.6% | <i>Amycolatopsis<br/>keratiniphila</i> ssp.<br><i>nogabecina</i> FH<br>1893 | Nogabecin               | Type II GPA                   | [41] |
| BGC0001462 | OLZ52648          | 5.65e-<br>71 | 47.0% | <i>Amycolatopsis<br/>coloradensis</i> DSM<br>44225                          | Avoparcin               | Type II GPA                   | [42] |
| BGC0001955 | AYA22339          | 4.13e-<br>70 | 46.6% | <i>Amycolatopsis<br/>keratiniphila</i> NRRL<br>B24117                       | Keratinimicin           | Type II GPA                   | [43] |



| (1)        | (2)                | (3)      | (4)   | (5)                                               | (6)          | (7)          | (8)  |
|------------|--------------------|----------|-------|---------------------------------------------------|--------------|--------------|------|
| BGC0001178 | AGS77330           | 8.30e-69 | 46.3% | <i>Actinoplanes</i> sp.<br>ATCC 53533             | UK-68,597    | Type III GPA | [44] |
| BGC0000290 | StaQ<br>AAM80553   | 6.10e-67 | 43.7% | <i>Streptomyces toyocaensis</i> NRRL 15009        | A47934       | Type III GPA | [45] |
| BGC0000418 | AIE77054           | 9.25e-73 | 47.2% | <i>Amycolatopsis lurida</i> NRRL 2430             | Ristocetin   | Type III GPA | [46] |
| BGC0000419 | AIG79246           | 4.05e-72 | 46.9% | <i>Amycolatopsis japonica</i> MG417-CF17          | Ristocetin   | Type III GPA | [47] |
| BGC0000440 | Tei15*<br>CAE53369 | 5.08e-68 | 44.5% | <i>Actinoplanes teichomyceticus</i><br>ATCC 31121 | Teicoplanin  | Type IV GPA  | [48] |
| BGC0002344 | NocRII<br>QYC40303 | 1.87e-72 | 45.9% | <i>Nonomuraea coxensis</i><br>DSM 45129           | A50926       | Type IV GPA  | [49] |
| BGC0000289 | Dbv4<br>CAD91199   | 2.35e-73 | 46.5% | <i>Nonomuraea gerenzanensis</i><br>ATCC 39727     | A40926       | Type IV GPA  | [50] |
| BGC0002637 | RSO11558           | 2.69e-78 | 48.4% | <i>Streptomyces</i> sp.<br>WAC 06783              | Rimomycin    | Type V GPA   | [51] |
| BGC0002638 | MCC50367<br>81     | 2.31e-78 | 47.7% | <i>Streptomyces</i> sp.<br>WAC 00631              | Misaugamycin | Type V GPA   | [51] |
| BGC0001635 | AQZ71349           | 1.28e-64 | 47.1% | <i>Nonomuraea</i> sp.<br>ATCC 55076               | Kistamicin   | Type V GPA   | [52] |
| BGC0000326 | AAK81822           | 3.76e-68 | 45.5% | <i>Streptomyces lavendulae</i> SANK 60477         | Complestatin | Type V GPA   | [53] |

**Table S2.** Summary of the StrR-like pathway specific regulators of some GPA BGCs absent in MIBiG.

| GenBank accession number for the hit | Protein ID | E value  | AA sequence identity | Organism                                 | Antibiotic                                 | Class        | Reference |
|--------------------------------------|------------|----------|----------------------|------------------------------------------|--------------------------------------------|--------------|-----------|
| HM486074                             | ADU56075   | 2.59e-92 | 57.3%                | Uncultured organism CA37                 | Putative GPA (predicted <i>in silico</i> ) | GPA          | [54]      |
| HM486074                             | ADU56074   | 2.25e-89 | 54.5%                | Uncultured organism CA37                 | Putative GPA (predicted <i>in silico</i> ) | GPA          | [54]      |
| HM486074                             | ADU56064   | 3.41e-66 | 45.8%                | Uncultured organism CA37                 | Putative GPA (predicted <i>in silico</i> ) | GPA          | [54]      |
| HM486075                             | ADU56085   | 1.38e-72 | 45.9%                | Uncultured organism CA878                | Putative GPA (predicted <i>in silico</i> ) | GPA          | [54]      |
| HM486076                             | ADU56159   | 4.61e-70 | 45.4%                | Uncultured organism CA915                | Putative GPA (predicted <i>in silico</i> ) | GPA          | [54]      |
| KF264554                             | AGS49770   | 2.70e-67 | 45.2%                | Uncultured bacterium esnapd15            | Putative GPA (predicted <i>in silico</i> ) | GPA          | [55]      |
| EU874253                             | ACJ60984   | 6.16e-74 | 46.5%                | Uncultured soil bacterium clone D30      | Putative GPA (predicted <i>in silico</i> ) | GPA          | [56]      |
| EU874252                             | ACJ60943   | 8.97e-73 | 47.1%                | Uncultured soil bacterium clone B128     | Putative GPA (predicted <i>in silico</i> ) | GPA          | [56]      |
| JX026280                             | AGF91741   | 9.20e-73 | 46.8%                | <i>Streptomyces</i> sp. WAC1420          | Pekiskomycin                               | Type I GPA   | [57]      |
| CP016174                             | ANN20081   | 3.93e-72 | 45.9%                | <i>Amycolatopsis orientalis</i> B-37     | Norvancomycin                              | Type I GPA   | [58]      |
| QHJI01000006                         | RSN30133   | 6.92e-75 | 47.2%                | <i>Amycolatopsis</i> sp. WAC 04169       | Dimethylvancomycin                         | Type I GPA   | [59]      |
| QHKI01000005                         | RSM88020   | 8.46e-74 | 47.9%                | <i>Kibdelosporangium aridum</i> A82846   | Chloroeremomycin                           | Type I GPA   | [59]      |
| JPLW01000007                         | KFZ77397   | 7.28e-73 | 46.9%                | <i>Amycolatopsis</i> sp. MJM2582         | Ristocetin                                 | Type III GPA | [46]      |
| CP024972                             | QXV59348   | 4.49e-69 | 46.5%                | <i>Amycolatopsis</i> sp. TNS106          | Ristocetin                                 | Type III GPA | [60]      |
| MUXN01000025                         | OOC02329   | 1.48e-72 | 46.5%                | <i>Amycolatopsis azurea</i> DSM 43854    | Azureomycin                                | Type III GPA | [61]      |
| QHGX01000008                         | RSN28334   | 3.13e-73 | 47.2%                | <i>Amycolatopsis</i> sp. WAC 01416       | GP01416                                    | Type IV GPA  | [59]      |
| CP029618                             | AZM51136   | 2.56e-75 | 49.2%                | <i>Streptomyces</i> sp. WAC 06738        | GP6738                                     | Type IV GPA  | [59]      |
| JMGY01000008                         | KEF19256   | 2.32e-78 | 48.4%                | <i>Streptomyces rimosus</i> R6-500MV9-R8 | Rimomycin                                  | Type V GPA   | [51]      |
| MCNU01000022                         | OFA57931   | 2.10e-74 | 46.4%                | <i>Streptomyces fradiae</i> Olg4R        | Miasugamycin                               | Type V GPA   | [51]      |





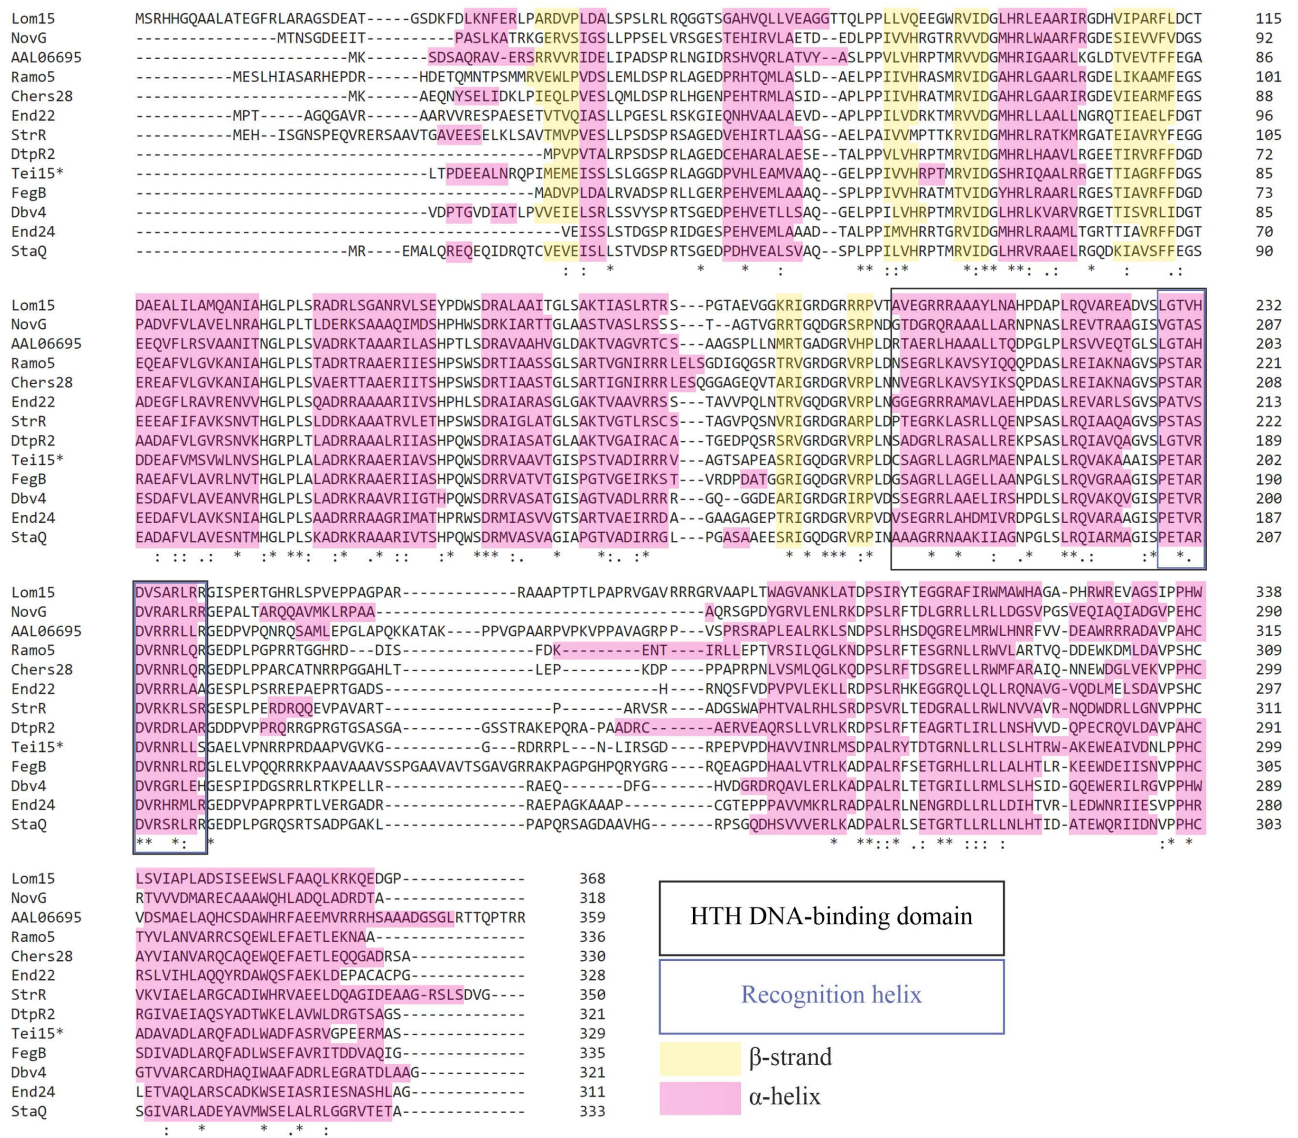

**Figure S2.** Multiple amino acid sequence alignment of 13 StrR-like PSRs that represent main clades of the phylogenetic tree from Figure S1, where the secondary structure of the proteins is shown. Secondary structure modelling was performed in CHIMERA X using AlphaFold [63–65]. Multiple amino acid sequence alignment was done using Clustal Omega [66].

## Supplementary References

1. Farnet, C.M. GENE CLUSTER FOR RAMOPLANIN BIOSYNTHESIS 2005, 222.
2. Yin, X.; Zabriskie, T.M. The enduracidin biosynthetic gene cluster from *Streptomyces fungicidicus*. *Microbiology* **2006**, 152, 2969–2983, doi:10.1099/mic.0.29043-0.
3. Morgan, K.T.; Zheng, J.; McCafferty, D.G. Discovery of Six Ramoplanin Family Gene Clusters and the Lipoglycopeptide Chersinamycin\*\*. *ChemBioChem* **2021**, 22, 176–185, doi:10.1002/cbic.202000555.
4. Du, Y.; Derewacz, D.K.; Deguire, S.M.; Teske, J.; Ravel, J.; Sulikowski, G.A.; Bachmann, B.O. Biosynthesis of the apoptolidins in *Nocardioopsis* sp. FU 40. *Tetrahedron* **2011**, 67, 6568–6575, doi:10.1016/J.TET.2011.05.106.
5. Chiu, H.T.; Weng, C.P.; Lin, Y.C.; Chen, K.H. Target-specific identification and characterization of the putative gene cluster for brasilinolide biosynthesis revealing the mechanistic insights and combinatorial synthetic utility of 2-deoxy-l-fucose biosynthetic enzymes. *Org. Biomol. Chem.* **2016**, 14, 1988–2006, doi:10.1039/C5OB02292D.
6. Li, W.; Ju, J.; Rajske, S.R.; Osada, H.; Shen, B. Characterization of the tautomycin biosynthetic gene cluster from *Streptomyces spiroverticillatus* unveiling new insights into dialkylmaleic anhydride and polyketide biosynthesis. *J. Biol. Chem.* **2008**, 283, 28607–28617, doi:10.1074/JBC.M804279200.
7. Liu, W.; Nonaka, K.; Nie, L.; Zhang, J.; Christenson, S.D.; Bae, J.; Van Lanen, S.G.; Zazopoulos, E.; Farnet, C.M.; Yang, C.F.; et al. The neocarzinostatin biosynthetic gene cluster from *Streptomyces carzinostaticus* ATCC 15944 involving two iterative type I polyketide synthases. *Chem. Biol.* **2005**, 12, 293–302, doi:10.1016/J.CHEMBIOL.2004.12.013.
8. Liu, W.; Christenson, S.D.; Standage, S.; Shen, B. Biosynthesis of the enediyne antitumor antibiotic C-1027. *Science* (80-. ). **2002**, 297, 1170–1173, doi:10.1126/science.1072110.
9. Van Lanen, S.G.; Oh, T.J.; Liu, W.; Wendt-Pienkowski, E.; Shen, B. Characterization of the maduropeptin biosynthetic gene cluster from *Actinomadura madurae* ATCC 39144 supporting a unifying paradigm for enediyne biosynthesis. *J. Am. Chem. Soc.* **2007**, 129, 13082–13094, doi:10.1021/JA073275O.
10. Li, X.; Lei, X.; Zhang, C.; Jiang, Z.; Shi, Y.; Wang, S.; Wang, L.; Hong, B. Complete genome sequence of *Streptomyces globisporus* C-1027, the producer of an enediyne antibiotic lidamycin. *J. Biotechnol.* **2016**, 222, 9–10, doi:10.1016/j.jbiotec.2016.02.004.
11. Yan, X.; Ge, H.; Huang, T.; Hindra; Yang, D.; Teng, Q.; Crnovčić, I.; Li, X.; Rudolf, J.D.; Lohman, J.R.; et al. Strain prioritization and genome mining for enediyne natural products. *MBio* **2016**, 7, doi:10.1128/mBio.02104-16.

12. Yang, C.; Huang, C.; Zhang, W.; Zhu, Y.; Zhang, C. Heterologous Expression of Fluostatin Gene Cluster Leads to a Bioactive Heterodimer. *Org. Lett.* **2015**, *17*, 5324–5327, doi:10.1021/ACS.ORGLETT.5B02683.
13. Janso, J.E.; Haltli, B.A.; Eustáquio, A.S.; Kulowski, K.; Waldman, A.J.; Zha, L.; Nakamura, H.; Bernan, V.S.; He, H.; Carter, G.T.; et al. Discovery of the lomaiviticin biosynthetic gene cluster in *Salinispora pacifica*. *Tetrahedron* **2014**, *70*, 4156–4164, doi:10.1016/j.tet.2014.03.009.
14. Erb, A.; Luzhetskyy, A.; Hardter, U.; Bechthold, A. Cloning and sequencing of the biosynthetic gene cluster for saquayamycin Z and galtamycin B and the elucidation of the assembly of their saccharide chains. *ChemBiochem* **2009**, *10*, 1392–1401, doi:10.1002/CBIC.200900054.
15. Jin, J.; Yang, X.; Liu, T.; Xiao, H.; Wang, G.; Zhou, M.; Liu, F.; Zhang, Y.; Liu, D.; Chen, M.; et al. Fluostatins M-Q Featuring a 6-5-6-6 Ring Skeleton and High Oxidized A-Rings from Marine *Streptomyces* sp. PKU-MA00045. *Mar. Drugs* **2018**, *16*, doi:10.3390/MD16030087.
16. Jiang, X.; Zhang, Q.; Zhu, Y.; Nie, F.; Wu, Z.; Yang, C.; Zhang, L.; Tian, X.; Zhang, C. Isolation, structure elucidation and biosynthesis of benzo[b]fluorene nenestatin A from deep-sea derived *Micromonospora echinospora* SCSIO 04089. *Tetrahedron* **2017**, *73*, 3585–3590, doi:10.1016/J.TET.2017.03.054.
17. Beyer, S.; Distler, J.; Piepersberg, W. The str gene cluster for the biosynthesis of 5'-hydroxystreptomycin in *Streptomyces glaucescens* GLA.0 (ETH 22794): New operons and evidence for pathway-specific regulation by StrR. *Mol. Gen. Genet.* **1996**, *250*, 775–784, doi:10.1007/BF02172990.
18. Palaniappan, N.; Ayers, S.; Gupta, S.; Habib, E.S.; Reynolds, K.A. Production of hygromycin A analogs in *Streptomyces hygrosopicus* NRRL 2388 through identification and manipulation of the biosynthetic gene cluster. *Chem. Biol.* **2006**, *13*, 753–764, doi:10.1016/J.CHEMBIOL.2006.05.013.
19. Yanai, K.; Murakami, T. The kanamycin biosynthetic gene cluster from *Streptomyces kanamyceticus*. *J. Antibiot. (Tokyo)*. **2004**, *57*, 351–354, doi:10.7164/ANTIBIOTICS.57.351.
20. Lyutskanova, D.; Distler, J.; Altenbuchner, J. A spectinomycin resistance determinant from the spectinomycin producer *Streptomyces flavopersicus*. *Microbiology* **1997**, *143* ( Pt 7), 2135–2143, doi:10.1099/00221287-143-7-2135.
21. Ohnishi, Y.; Ishikawa, J.; Hara, H.; Suzuki, H.; Ikenoya, M.; Ikeda, H.; Yamashita, A.; Hattori, M.; Horinouchi, S. Genome sequence of the streptomycin-producing microorganism *Streptomyces griseus* IFO 13350. *J. Bacteriol.* **2008**, *190*, 4050–4060, doi:10.1128/JB.00204-08.
22. Pojer, F.; Li, S.M.; Heide, L. Molecular cloning and sequence analysis of the clorobiocin biosynthetic gene cluster: New insights into the biosynthesis of aminocoumarin

antibiotics. *Microbiology* **2002**, *148*, 3901–3911, doi:10.1099/00221287-148-12-3901.

23. Wang, Z.X.; Li, S.M.; Heide, L. Identification of the coumermycin A1 biosynthetic gene cluster of streptomyces rishiriensis DSM 40489. *Antimicrob. Agents Chemother.* **2000**, *44*, 3040–3048, doi:10.1128/AAC.44.11.3040-3048.2000.
24. Steffensky, M.; Mühlenweg, A.; Wang, Z.X.; Li, S.M.; Heide, L. Identification of the novobiocin biosynthetic gene cluster of Streptomyces spheroides NCIB 11891. *Antimicrob. Agents Chemother.* **2000**, *44*, 1214–1222, doi:10.1128/AAC.44.5.1214-1222.2000.
25. Xu, F.; Kong, D.; He, X.; Zhang, Z.; Han, M.; Xie, X.; Wang, P.; Cheng, H.; Tao, M.; Zhang, L.; et al. Characterization of streptonigrin biosynthesis reveals a cryptic carboxyl methylation and an unusual oxidative cleavage of a N-C bond. *J. Am. Chem. Soc.* **2013**, *135*, 1739–1748, doi:10.1021/JA3069243.
26. Rui, Z.; Ye, M.; Wang, S.; Fujikawa, K.; Akerele, B.; Aung, M.; Floss, H.G.; Zhang, W.; Yu, T.W. Insights into a divergent phenazine biosynthetic pathway governed by a plasmid-born esmeraldin gene cluster. *Chem. Biol.* **2012**, *19*, 1116–1125, doi:10.1016/J.CHEMBIOL.2012.07.025.
27. McAlpine, J.B.; Banskota, A.H.; Charan, R.D.; Schlingmann, G.; Zazopoulos, E.; Pirae, M.; Janso, J.; Bernan, V.S.; Aouidate, M.; Farnet, C.M.; et al. Biosynthesis of diazepinomicin/ECO-4601, a Micromonospora secondary metabolite with a novel ring system. *J. Nat. Prod.* **2008**, *71*, 1585–1590, doi:10.1021/NP800376N.
28. Zhang, M.; Yang, C.L.; Xiao, Y.S.; Zhang, B.; Deng, X.Z.; Yang, L.; Shi, J.; Wang, Y.S.; Li, W.; Jiao, R.H.; et al. Aurachin SS, a new antibiotic from Streptomyces sp. NA04227. *J. Antibiot. (Tokyo)*. **2017**, *70*, 853–855, doi:10.1038/JA.2017.50.
29. Zhu, X.M.; Hackl, S.; Thaker, M.N.; Kalan, L.; Weber, C.; Urgast, D.S.; Krupp, E.M.; Brewer, A.; Vanner, S.; Szawiola, A.; et al. Biosynthesis of the Fluorinated Natural Product Nucleocidin in Streptomyces calvus Is Dependent on the bldA-Specified Leu-tRNA(UUA) Molecule. *Chembiochem* **2015**, *16*, 2498–2506, doi:10.1002/CBIC.201500402.
30. Zhao, G.; Yao, S.; Rothchild, K.W.; Liu, T.; Liu, Y.; Lian, J.; He, H.Y.; Ryan, K.S.; Du, Y.L. The Biosynthetic Gene Cluster of Pyrazomycin—A C-Nucleoside Antibiotic with a Rare Pyrazole Moiety. *ChemBioChem* **2020**, *21*, 644–649, doi:10.1002/CBIC.201900449.
31. Zhang, M.; Zhang, P.; Xu, G.; Zhou, W.; Gao, Y.; Gong, R.; Cai, Y.S.; Cong, H.; Deng, Z.; Price, N.P.J.; et al. Comparative Investigation into Formycin A and Pyrazofurin A Biosynthesis Reveals Branch Pathways for the Construction of C-Nucleoside Scaffolds. *Appl. Environ. Microbiol.* **2020**, *86*, doi:10.1128/AEM.01971-19.
32. Huang, S.; Tong, M.; Qin, Z.; Deng, Z.; Deng, H.; Yu, Y. Identification and characterization of the biosynthetic gene cluster of thiolutin, a tumor angiogenesis inhibitor, in Saccharothrix algeriensis NRRL B-24137. *Anticancer. Agents Med. Chem.* **2015**, *15*, 277–284, doi:10.2174/1871520614666141027145200.

33. He, J.; Magarvey, N.; Pirae, M.; Vining, L.C. The gene cluster for chloramphenicol biosynthesis in *Streptomyces venezuelae* ISP5230 includes novel shikimate pathway homologues and a monomolecular non-ribosomal peptide synthetase gene. *Microbiology* **2001**, *147*, 2817–2829, doi:10.1099/00221287-147-10-2817.
34. Ma, J.; Huang, H.; Xie, Y.; Liu, Z.; Zhao, J.; Zhang, C.; Jia, Y.; Zhang, Y.; Zhang, H.; Zhang, T.; et al. Biosynthesis of ilamycins featuring unusual building blocks and engineered production of enhanced anti-tuberculosis agents. *Nat. Commun.* **2017**, *8*, doi:10.1038/S41467-017-00419-5.
35. Tomita, H.; Katsuyama, Y.; Minami, H.; Ohnishi, Y. Identification and characterization of a bacterial cytochrome P450 monooxygenase catalyzing the 3-nitration of tyrosine in rufomycin biosynthesis. *J. Biol. Chem.* **2017**, *292*, 15859–15869, doi:10.1074/JBC.M117.791269.
36. Gonsior, M.; Mühlenweg, A.; Tietzmann, M.; Rausch, S.; Poch, A.; Süssmuth, R.D. Biosynthesis of the peptide antibiotic feglymycin by a linear nonribosomal peptide synthetase mechanism. *ChemBioChem* **2015**, *16*, 2610–2614, doi:10.1002/cbic.201500432.
37. Pelzer, S.; Süßmuth, R.; Heckmann, D.; Recktenwald, J.; Huber, P.; Jung, G.; Wohlleben, W. Identification and analysis of the balhimycin biosynthetic gene cluster and its use for manipulating glycopeptide biosynthesis in *Amycolatopsis mediterranei* DSM5908. *Antimicrob. Agents Chemother.* **1999**, *43*, 1565–1573, doi:10.1128/aac.43.7.1565.
38. Xu, L.; Huang, H.; Wei, W.; Zhong, Y.; Tang, B.; Yuan, H.; Zhu, L.; Huang, W.; Ge, M.; Yang, S.; et al. Complete genome sequence and comparative genomic analyses of the vancomycin-producing *Amycolatopsis orientalis*. *BMC Genomics* **2014**, *15*, 1–18, doi:10.1186/1471-2164-15-363.
39. Tan, G.Y.A.; Robinson, S.; Lacey, E.; Brown, R.; Kim, W.; Goodfellow, M. *Amycolatopsis regifaucium* sp. nov., a novel actinomycete that produces kigamicins. *Int. J. Syst. Evol. Microbiol.* **2007**, *57*, 2562–2567, doi:10.1099/IJS.0.64974-0.
40. Kaur, N.; Kumar, S.; Bala, M.; Raghava, G.P.S.; Mayilraj, S. Draft genome sequence of *Amycolatopsis decaplanina* strain DSM 44594T. *Genome Announc.* **2013**, *1*, e0013813, doi:10.1128/genomeA.00138-13.
41. Wink, J.M.; Kroppenstedt, R.M.; Ganguli, B.N.; Nadkarni, S.R.; Schumann, P.; Seibert, G.; Stackebrandt, E. Three new antibiotic producing species of the genus *Amycolatopsis*, *Amycolatopsis balhimycina* sp. nov., *A. tolypomycina* sp. nov., *A. vancoresmycina* sp. nov., and description of *Amycolatopsis keratiniphila* subsp. *keratiniphila* subsp. nov. and *A. keratiniphi*. *Syst. Appl. Microbiol.* **2003**, *26*, 38–46, doi:10.1078/072320203322337290.
42. Labeda, D.P. *Amycolatopsis coloradensis* sp. nov., the avoparcin (LL-AV290)-producing strain. *Int. J. Syst. Bacteriol.* **1995**, *45*, 124–127, doi:10.1099/00207713-45-1-124/CITE/REFWORKS.
43. Xu, F.; Wu, Y.; Zhang, C.; Davis, K.M.; Moon, K.; Bushin, L.B.; Seyedsayamdost, M.R.



A genetics-free method for high-throughput discovery of cryptic microbial metabolites. *Nat. Chem. Biol.* **2019**, *15*, 161–168, doi:10.1038/s41589-018-0193-2.

44. Yim, G.; Kalan, L.; Koteva, K.; Thaker, M.N.; Waglechner, N.; Tang, I.; Wright, G.D. Harnessing the synthetic capabilities of glycopeptide antibiotic tailoring enzymes: Characterization of the UK-68, 597 biosynthetic cluster. *ChemBioChem* **2014**, *15*, 2613–2623, doi:10.1002/cbic.201402179.
45. Pootoolal, J.; Thomas, M.G.; Marshall, C.G.; Neu, J.M.; Hubbard, B.K.; Walsh, C.T.; Wright, G.D. Assembling the glycopeptide antibiotic scaffold: The biosynthesis of A47934 from streptomyces toyocaensis NRRL15009. *Proc. Natl. Acad. Sci. U. S. A.* **2002**, *99*, 8962–8967, doi:10.1073/pnas.102285099.
46. Truman, A.W.; Kwun, M.J.; Cheng, J.; Yang, S.H.; Suh, J.W.; Hong, H.J. Antibiotic resistance mechanisms inform discovery: Identification and characterization of a novel amycolatopsis strain producing ristocetin. *Antimicrob. Agents Chemother.* **2014**, *58*, 5687–5695, doi:10.1128/AAC.03349-14.
47. Spohn, M.; Kirchner, N.; Kulik, A.; Jochim, A.; Wolf, F.; Muenzer, P.; Borst, O.; Gross, H.; Wohlleben, W.; Stegmann, E. Overproduction of ristomycin a by activation of a silent gene cluster in amycolatopsis japonicum mg417-cf17. *Antimicrob. Agents Chemother.* **2014**, *58*, 6185–6196, doi:10.1128/AAC.03512-14.
48. Sosio, M.; Kloosterman, H.; Bianchi, A.; de Vreugd, P.; Dijkhuizen, L.; Donadio, S. Organization of the teicoplanin gene cluster in Actinoplanes teichomyceticus. *Microbiology* **2004**, *150*, 95–102, doi:10.1099/mic.0.26507-0.
49. Yushchuk, O.; Vior, N.M.; Andreo-Vidal, A.; Berini, F.; Rückert, C.; Busche, T.; Binda, E.; Kalinowski, J.; Truman, A.W.; Marinelli, F. Genomic-Led Discovery of a Novel Glycopeptide Antibiotic by Nonomuraea coxensis DSM 45129. *ACS Chem. Biol.* **2021**, *16*, 915–928, doi:10.1021/acscchembio.1c00170.
50. Sosio, M.; Stinchi, S.; Beltrametti, F.; Lazzarini, A.; Donadio, S. The gene cluster for the biosynthesis of the glycopeptide antibiotic A40926 by Nonomuraea species. *Chem. Biol.* **2003**, *10*, 541–549, doi:10.1016/S1074-5521(03)00120-0.
51. Xu, M.; Wang, W.; Waglechner, N.; Culp, E.J.; Guiton, A.K.; Wright, G.D. Phylogeny-Informed Synthetic Biology Reveals Unprecedented Structural Novelty in Type v Glycopeptide Antibiotics. *ACS Cent. Sci.* **2022**, *8*, 615–626, doi:10.1021/acscentsci.1c01389.
52. Nazari, B.; Forneris, C.C.; Gibson, M.I.; Moon, K.; Schramma, K.R.; Seyedsayamdost, M.R. Nonomuraea sp. ATCC 55076 harbours the largest actinomycete chromosome to date and the kistamicin biosynthetic gene cluster. *Medchemcomm* **2017**, *8*, 780–788, doi:10.1039/c6md00637j.
53. Chiu, H.T.; Hubbard, B.K.; Shah, A.N.; Eide, J.; Fredenburg, R.A.; Walsh, C.T.; Khosla, C. Molecular cloning and sequence analysis of the complestatin biosynthetic gene cluster. *Proc. Natl. Acad. Sci. U. S. A.* **2001**, *98*, 8548–8553, doi:10.1073/pnas.151246498.

54. Banik, J.J.; Craig, J.W.; Calle, P.Y.; Brady, S.F. Tailoring enzyme-rich environmental DNA clones: A source of enzymes for generating libraries of unnatural natural products. *J. Am. Chem. Soc.* **2010**, *132*, 15661–15670, doi:10.1021/ja105825a.
55. Owen, J.G.; Reddy, B.V.B.; Ternei, M.A.; Charlop-Powers, Z.; Calle, P.Y.; Kim, J.H.; Brady, S.F. Mapping gene clusters within arrayed metagenomic libraries to expand the structural diversity of biomedically relevant natural products. *Proc. Natl. Acad. Sci. U. S. A.* **2013**, *110*, 11797–11802, doi:10.1073/pnas.1222159110.
56. Banik, J.J.; Brady, S.F. Cloning and characterization of new glycopeptide gene clusters found in an environmental DNA megalibrary. *Proc. Natl. Acad. Sci. U. S. A.* **2008**, *105*, 17273–17277, doi:10.1073/pnas.0807564105.
57. Thaker, M.N.; Wang, W.; Spanogiannopoulos, P.; Waglechner, N.; King, A.M.; Medina, R.; Wright, G.D. Identifying producers of antibacterial compounds by screening for antibiotic resistance. *Nat. Biotechnol.* **2013**, *31*, 922–927, doi:10.1038/nbt.2685.
58. Lei, X.; Yuan, F.; Shi, Y.; Li, X.; Wang, L.; Hong, B. Draft genome sequence of norvancomycin-producing strain *Amycolatopsis orientalis* CPCC200066. *Genome Announc.* **2015**, *3*, doi:10.1128/genomeA.00296-15.
59. Waglechner, N.; McArthur, A.G.; Wright, G.D. Phylogenetic reconciliation reveals the natural history of glycopeptide antibiotic biosynthesis and resistance. *Nat. Microbiol.* **2019**, *4*, 1862–1871, doi:10.1038/s41564-019-0531-5.
60. Liu, K.; Hu, X.R.; Zhao, L.X.; Wang, Y.; Deng, Z.; Taoa, M. Enhancing Ristomycin A Production by Overexpression of ParBLike StrR Family Regulators Controlling the Biosynthesis Genes. *Appl. Environ. Microbiol.* **2021**, *87*, 1–19, doi:10.1128/AEM.01066-21.
61. Khatri, I.; Subramanian, S.; Mayilraj, S. Genome sequencing and annotation of *Amycolatopsis azurea* DSM 43854T. *Genomics Data* **2014**, *2*, 44–45, doi:10.1016/j.gdata.2013.12.003.
62. Tamura, K.; Stecher, G.; Kumar, S. MEGA11: Molecular Evolutionary Genetics Analysis Version 11. *Mol. Biol. Evol.* **2021**, *38*, 3022–3027, doi:10.1093/molbev/msab120.
63. Pettersen, E.F.; Goddard, T.D.; Huang, C.C.; Meng, E.C.; Couch, G.S.; Croll, T.I.; Morris, J.H.; Ferrin, T.E. UCSF ChimeraX: Structure visualization for researchers, educators, and developers. *Protein Sci.* **2021**, *30*, 70–82, doi:10.1002/pro.3943.
64. Mirdita, M.; Schütze, K.; Moriwaki, Y.; Heo, L.; Ovchinnikov, S.; Steinegger, M. ColabFold: making protein folding accessible to all. *Nat. Methods* **2022**, *19*, 679–682, doi:10.1038/s41592-022-01488-1.
65. Jumper, J.; Evans, R.; Pritzel, A.; Green, T.; Figurnov, M.; Ronneberger, O.; Tunyasuvunakool, K.; Bates, R.; Žídek, A.; Potapenko, A.; et al. Highly accurate protein structure prediction with AlphaFold. *Nature* **2021**, *596*, 583–589,

doi:10.1038/s41586-021-03819-2.

66. Sievers, F.; Higgins, D.G. Clustal Omega. *Curr. Protoc. Bioinforma.* **2014**, 2014, 3.13.1-3.13.16, doi:10.1002/0471250953.bi0313s48.
